# Supplementary material for: Heterozygous DHTKD1 Variants in Two European Cohorts of Amyotrophic Lateral Sclerosis Patients
Source: MDPI journal article supplement (doi:10.3390/genes13010084), 2021-12-29
Supplement: s1 [file s1]

## **Heterozygous *DHTKD1* Variants in two European Cohorts of Amyotrophic Lateral Sclerosis Patients**

Alma Osmanovic<sup>1,2,3,†</sup>, Isabel Gogol<sup>1,2,†</sup>, Helge Martens<sup>1</sup>, Maylin Widjaja<sup>1,2</sup>, Kathrin Müller<sup>4</sup>, Olivia Schreiber-Katz<sup>2</sup>, Friedrich Feuerhake<sup>5</sup>, Claus-Dieter Langhans<sup>6</sup>, Gunnar Schmidt<sup>1</sup>, Peter M. Andersen<sup>7</sup>, Albert C. Ludolph<sup>4</sup>, Jochen H. Weishaupt<sup>4,8</sup>, Frank Brand<sup>1</sup>, Susanne Petri<sup>2,\*,#</sup>, Ruthild G. Weber<sup>1,\*,#</sup>

<sup>1</sup>Department of Human Genetics, Hannover Medical School, Hannover, 30625, Germany;

<sup>2</sup>Department of Neurology, Hannover Medical School, Hannover, 30625, Germany;

<sup>3</sup>Essen Center for Rare Diseases (EZSE), University Hospital Essen, Essen, 45147, Germany;

<sup>4</sup>Department of Neurology, University of Ulm, Ulm, 89070, Germany;

<sup>5</sup>Department of Neuropathology, Institute of Pathology, Hannover Medical School, Hannover, 30625, Germany;

<sup>6</sup>GCMS Laboratory, Dietmar Hopp Metabolic Center, University Children's Hospital, Heidelberg, 69120, Germany;

<sup>7</sup>Department of Clinical Sciences, Neurosciences, Umeå University, Umeå, 90185, Sweden;

<sup>8</sup>Division for Neurodegenerative Diseases, Department of Neurology, Medical Faculty Mannheim, University of Heidelberg, Mannheim, 68167, Germany.

<sup>†</sup>These authors contributed equally as first authors to this work.

<sup>#</sup>These authors contributed equally as senior authors to this work.

\*Correspondence: Ruthild G. Weber, M.D., Hannover Medical School, Department of Human Genetics, Carl-Neuberg-Str. 1, 30625 Hannover, Germany, Phone: +49 511 532 7751, Fax: +49 511 532 18520, Email: Weber.Ruthild@mh-hannover.de

Susanne Petri, M.D., Hannover Medical School, Department of Neurology, Carl-Neuberg-Str. 1, 30625 Hannover, Germany, Email: Petri.Susanne@mh-hannover.de

**Supplementary Table S1.** Strategy used for the analysis of whole-exome sequencing data of 27 ALS patients of cohort 1.

| Filtering steps                                                                                                                              | Number of variants                                                                |
|----------------------------------------------------------------------------------------------------------------------------------------------|-----------------------------------------------------------------------------------|
| Total variants in exomes ( $\pm 20$ bases into intron) obtained by analyzing leukocyte DNA of 27 ALS patients of cohort 1                    | 89,934                                                                            |
| Variants with a read depth of $\geq 35$ , a call quality of $\geq 100$ , and an allele fraction of $\geq 45\%$ are retained                  | 66,296                                                                            |
| Rare variants (minor allele frequency $\leq 0.5\%$ in 1000 Genomes Project, gnomAD database, and NHLBI ESP exomes) <sup>a</sup> are retained | 7,409                                                                             |
| Non-silent variants, i.e. splice site (up to 2 bases into intron), frameshift, stop gained/lost, and missense variants are retained          | 4,473                                                                             |
| Comparison with identically generated exome data of in-house control individuals (n=148), variants not present in controls are retained      | 1,163                                                                             |
| Variants predicted to be pathogenic (by SIFT, PolyPhen-2) <sup>b</sup> in genes affected in at least two of the 27 ALS patients are retained | 256                                                                               |
| Variants in genes associated with neurodegeneration (n=694) <sup>c</sup> are retained                                                        | 2 ( <i>DHTKD1</i> :c.1246C>T p.(Gln416*), <i>DHTKD1</i> :c.1364G>A p.(Arg455Gln)) |

<sup>a</sup>1000 Genomes Project data (<https://www.internationalgenome.org/>), Genome Aggregation Database (gnomAD; <https://gnomad.broadinstitute.org/>), NHLBI Exome Sequencing Project (<https://evs.gs.washington.edu/EVS/>)

<sup>b</sup>SIFT (<http://sift.jcvi.org/>), PolyPhen-2 (<http://genetics.bwh.harvard.edu/pph2/>)

<sup>c</sup>According to Clinical Insight Interpret 8.0 (Qiagen, Hilden, Germany)

**Supplementary Table S2.** PCR primers used for amplification and sequencing of *DHTKD1*.

| Exon | Forward primer                                                   | Reverse primer                                                     |
|------|------------------------------------------------------------------|--------------------------------------------------------------------|
| 1    | 5'-GTTTCGTA CTGGGAGCAGGT-3'                                      | 5'-AGTTACAGAGGATGGACGGG-3'                                         |
| 2    | 5'-GTAAGGTGTCTAGGGCTGTAAGAG-3'                                   | 5'-GAGAAAACAGGCCTCCTCAGAACT-3'                                     |
| 3    | 5'-CAGGATTATTGAACATGGGGAAGG-3'<br>5'-GTTCCAGAATTA ACTTGCCAC-3'   | 5'-CTTTATAGGCAGTGAGGCTGACCT-3'                                     |
| 4    | 5'-TCCACTGGAGAAGCTGGC-3'                                         | 5'-CACCAGAATGAAACCAGCAG-3'                                         |
| 5    | 5'-TTCTTATGCCTCAGCCTCTCTACT-3'                                   | 5'-AGGCTAAAGCCAGTTGCCTGAA-3'                                       |
| 6    | 5'-GATGCAGTGAGCTGAGATCGTG-3'                                     | 5'-CTGTGTGCACCAGAGGTTTC-3'                                         |
| 7    | 5'-AGCTTTACCGAGGTCACACA-3'<br>5'-TTGATGCAGGAAGTAGGGCT-3'         | 5'-GAGGATCACTTGAGGCAGG-3'                                          |
| 8    | 5'-CTTGACAGTGACTCTCCTTGTCT-3'<br>5'-GGCCTCCCAA AATGCTAAGATTG-3'  | 5'-ACAACTGAAAACACCAGACCAACG-3'<br>5'-CAGTTTCTAGAACCTAACGACACACA-3' |
| 9    | 5'-GCCTGGCCTGCATTAAATTTTTTG-3'                                   | 5'-GCTTTAGAACCTCTCTGGTCAATG-3'                                     |
| 10   | 5'-CCTCTCCACTCTTATGCAATCTCA-3'                                   | 5'-CTCTAGGGGTTACTTGCATTCCAA-3'                                     |
| 11   | 5'-ATGAACGAGAGCAAGGCTCC-3'                                       | 5'-GCCACACTCCCGTCAATAACA-3'                                        |
| 12   | 5'-AGCATAACAGTTCTAGAAGGTGCA-3'                                   | 5'-CCTGAGGCATTACGTTTCCAAAGA-3'                                     |
| 13   | 5'-CGCACCGTTCATAAATTCACCT-3'                                     | 5'-TCGCTTAAACCCAGGAGTCA-3'                                         |
| 14   | 5'-CAAGGCATTGCGTCTATTAGGAC-3'                                    | 5'-GAGGCGGAGGTTGCATAGAG-3'                                         |
| 15   | 5'-CTGAAGAAGGGTCCCCAGGAATAG-3'<br>5'-GGTCTTGATTTCCTGACCTCGTGA-3' | 5'-CCCGGCCCAAGATTCAATTTTCTA-3'                                     |
| 16   | 5'-GTGAATGTGAATCCCTTTCACACC-3'                                   | 5'-GAAGAGATTAGAGGGACAGGGCTC-3'                                     |
| 17   | 5'-GGAGCCCTGTCCCTCTAATC-3'                                       | 5'-GAGGAAGGAGGCCTCTTTTAATGG-3'                                     |

**Supplementary Table S3.** Clinical and electrophysiological characteristics of sporadic ALS patients of cohort 1 carrying rare heterozygous *DHTKD1* variants.

| Patient | Amino acid change | Gen-der | Country of origin | Age of onset (years) | Site of onset | ALS subtype <sup>a</sup> | Disease duration (years) <sup>b</sup> | ALSFRS-R progression rate | Sensory impairment                                                         | EMG                                                                      | NCS                                              | CMAP in median nerve (mV) <sup>c</sup> |
|---------|-------------------|---------|-------------------|----------------------|---------------|--------------------------|---------------------------------------|---------------------------|----------------------------------------------------------------------------|--------------------------------------------------------------------------|--------------------------------------------------|----------------------------------------|
| VALS054 | p.(Ala70Gly)      | M       | Germany           | 72                   | S             | PMA                      | >9.08                                 | 0.24                      | Pallhypoaesthesia, hypaesthesia                                            | Acute/chronic denervation in UL and LL                                   | Axonal and demyelinating sensorimotor neuropathy | 0.98                                   |
| VALS102 | p.(Ala70Gly)      | F       | Germany           | 57                   | S             | Classic                  | 1.67                                  | 1.63                      | None                                                                       | Acute/chronic denervation in UL and LL                                   | Axonal and demyelinating motor neuropathy        | 1.27                                   |
| VALS046 | p.(Met198Thr)     | M       | Poland            | 53                   | S             | Classic                  | 3.25                                  | 0.40                      | None                                                                       | Acute/chronic denervation in UL and LL                                   | Axonal motor neuropathy                          | 5.15                                   |
| MD086   | p.(Ala210Ser)     | M       | Germany           | 49                   | S             | Classic                  | >1.58                                 | 1.17                      | None                                                                       | Acute/chronic denervation in UL; acute denervation in LL                 | -                                                | -                                      |
| VALS095 | p.(Ala210Ser)     | M       | Germany           | 73                   | S             | LMN                      | 2.83                                  | -                         | Pallhypoaesthesia                                                          | Acute/chronic denervation in UL and LL                                   | Axonal and demyelinating sensorimotor neuropathy | 1.30                                   |
| MD011   | p.(Gln416*)       | F       | Germany           | 69                   | B             | Bulbar                   | 1.83                                  | 0.57                      | Paresthesia                                                                | Acute/chronic denervation in LL; acute denervation in UL                 | Axonal motor neuropathy                          | 4.92                                   |
| MD022   | p.(Arg455Gln)     | M       | Germany           | 72                   | S             | Classic                  | 3.33                                  | 1.71                      | Pallhypoaesthesia, reduced sharp/blunt differentiation                     | Acute/chronic denervation in UL and LL                                   | Axonal sensorimotor neuropathy                   | 0.93                                   |
| VALS001 | p.(Gly729Arg)     | F       | Germany           | 70                   | S             | Classic                  | 2.17                                  | 1.26                      | None                                                                       | Acute/chronic denervation in UL and LL                                   | Axonal and demyelinating motor neuropathy        | 0.33                                   |
| VALS164 | p.(Gly729Arg)     | F       | Germany           | 71                   | B             | Bulbar                   | >3.08                                 | 2.17                      | Pallhypoaesthesia, hypaesthesia, and reduced sensation of cold in the feet | Chronic denervation in UL and LL; acute denervation in thorax and tongue | Axonal motor neuropathy                          | 8.08                                   |
| MD025   | p.(Gly729Arg)     | M       | Germany           | 73                   | S             | Classic                  | 2.17                                  | 0.77                      | Pallhypoaesthesia                                                          | Acute/chronic denervation in UL and LL                                   | Axonal sensorimotor neuropathy                   | 6.55                                   |

Abbreviations: ALS: amyotrophic lateral sclerosis; ALSFRS-R: revised ALS functional rating scale; B: bulbar; CMAP: compound muscle action potential; EMG: electromyography; F, female; LL: lower limb; LMN: lower motor neuron subtype; M: male; NCS: nerve conduction study; PMA: progressive muscular atrophy; S: spinal; UL: upper limb; -, not available.

<sup>a</sup>Chiò et al. 2011

<sup>b</sup>Until last follow-up (VALS054, VALS164), total invasive ventilation (MD086), or death (MD011, MD022, MD025, VALS001, VALS046, VALS095, and VALS102)

<sup>c</sup>Mean CMAP in median nerve (right and left) at time of initial diagnosis, CMAP in-house standard for median nerve >7mV

**References**

Chiò, A.; Calvo, A.; Moglia, C.; Mazzini, L.; Mora, G. Phenotypic heterogeneity of amyotrophic lateral sclerosis: a population based study. *J. Neurol. Neurosurg. Psychiatry* **2011**, *82*, 740-746.
